# Supplementary material for: Human Enriched Serum Following Hydrolysed Collagen Absorption Modulates Bone Cell Activity: from Bedside to Bench and Vice Versa
Source: MDPI journal article supplement (doi:10.3390/nu11061249), 2019-05-31
Supplement: s1 [file s1]

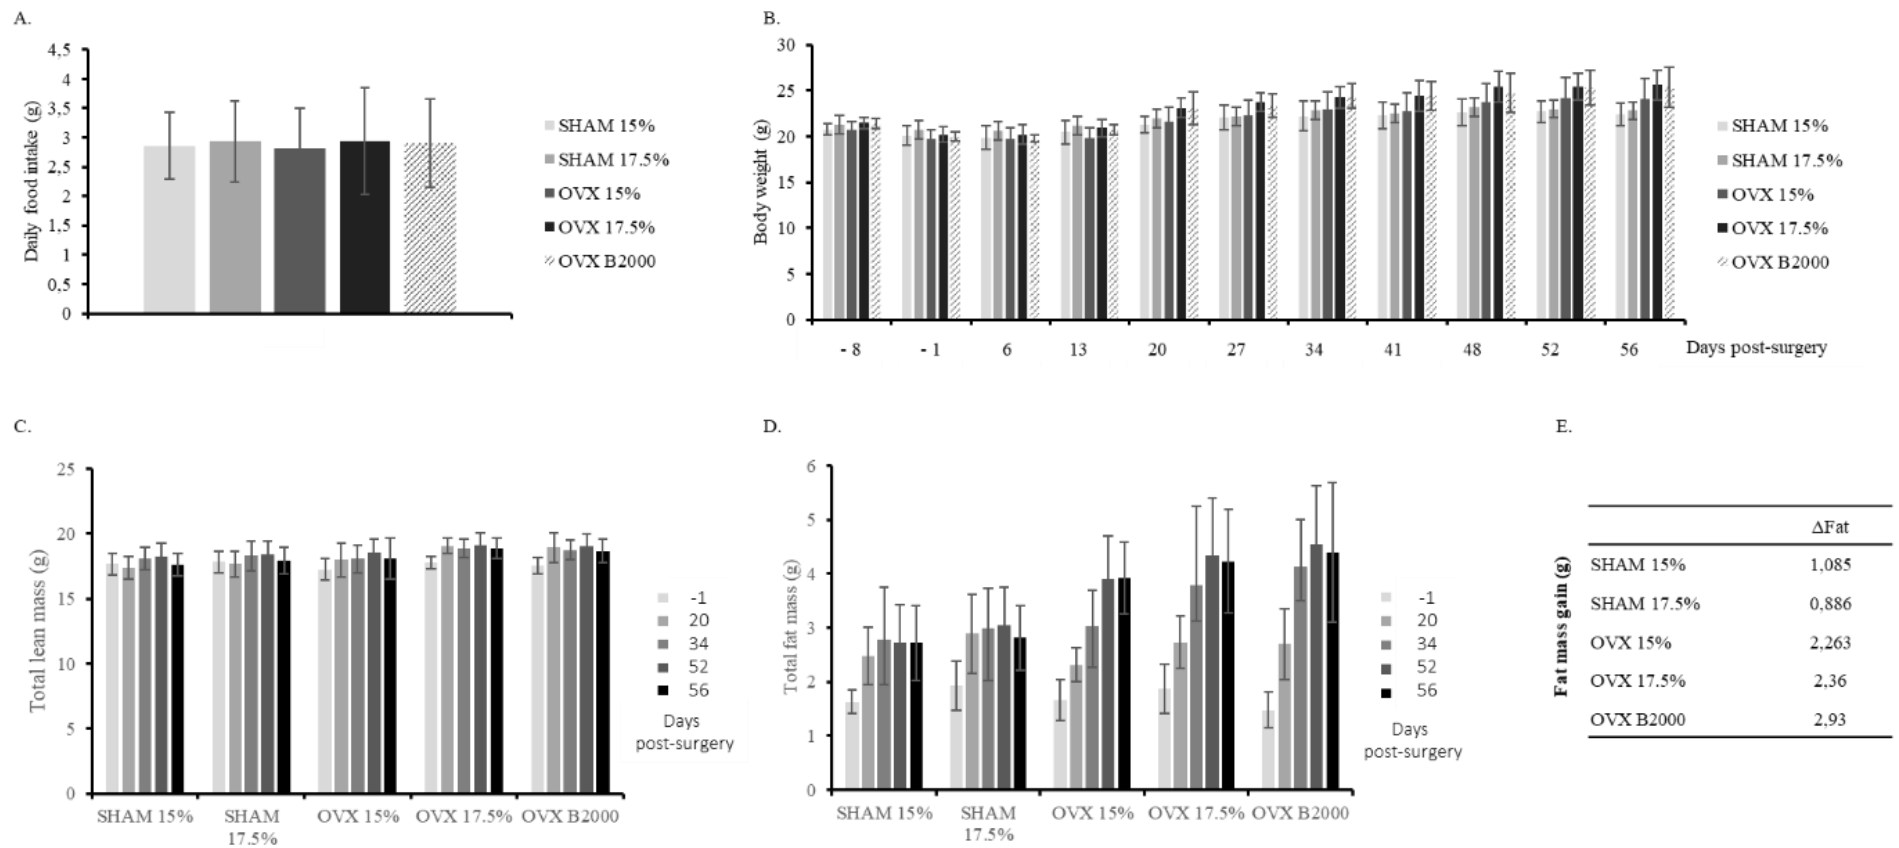

**Figure S1.** Murinometric parameters during in vivo experiment. **(A)** Daily food intake. **(B)** Body weight. **(C)** and **(D)**: Body composition as lean and fat mass, respectively. **(E)** Body fat gain during the experiment. Summary: there is no variation in daily food intake; OVX induces weight gain independently of the diet; OVX-induced weight gain relies on fat mass gain exclusively.

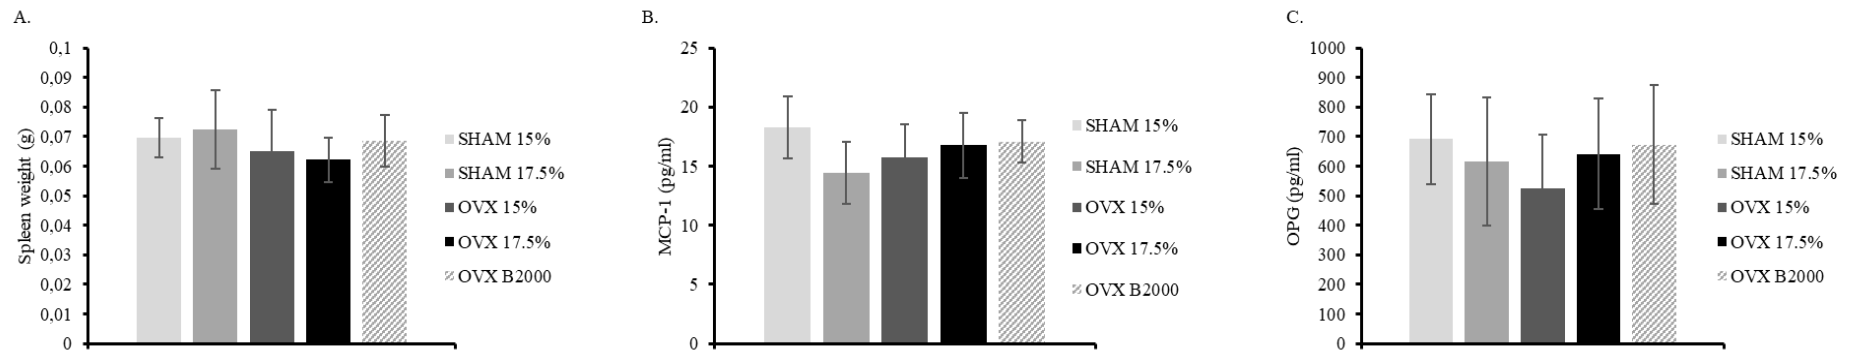

**Figure S2.** Inflammatory parameters and cytokine profiles. **(A)** Spleen weight. **(B)** Circulating MCP-1 serum concentration. **(C)** Circulating OPG serum concentration. Summary: there is no variation of neither spleen weight (lymphoid organ), MCP-1, nor OPG levels. The influence of HC (from bovine origin) on mouse skeleton is not related to the modulation of inflammatory parameters.

A.

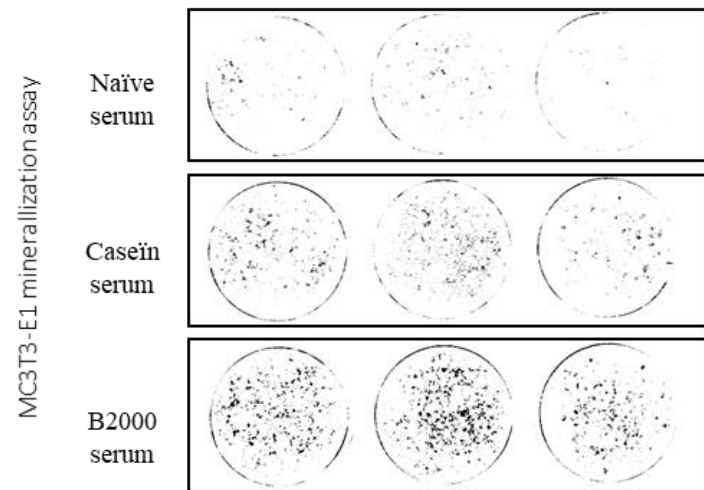

B.

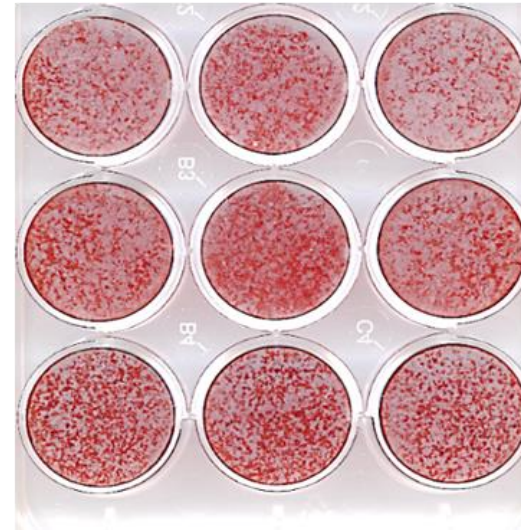

**Figure S3.** Alizarin red staining of the mineralization assay in MC3T3-E1 cells following enriched serum incubation ( $n = 3$ ). Data supporting Figures 2D and 2E.

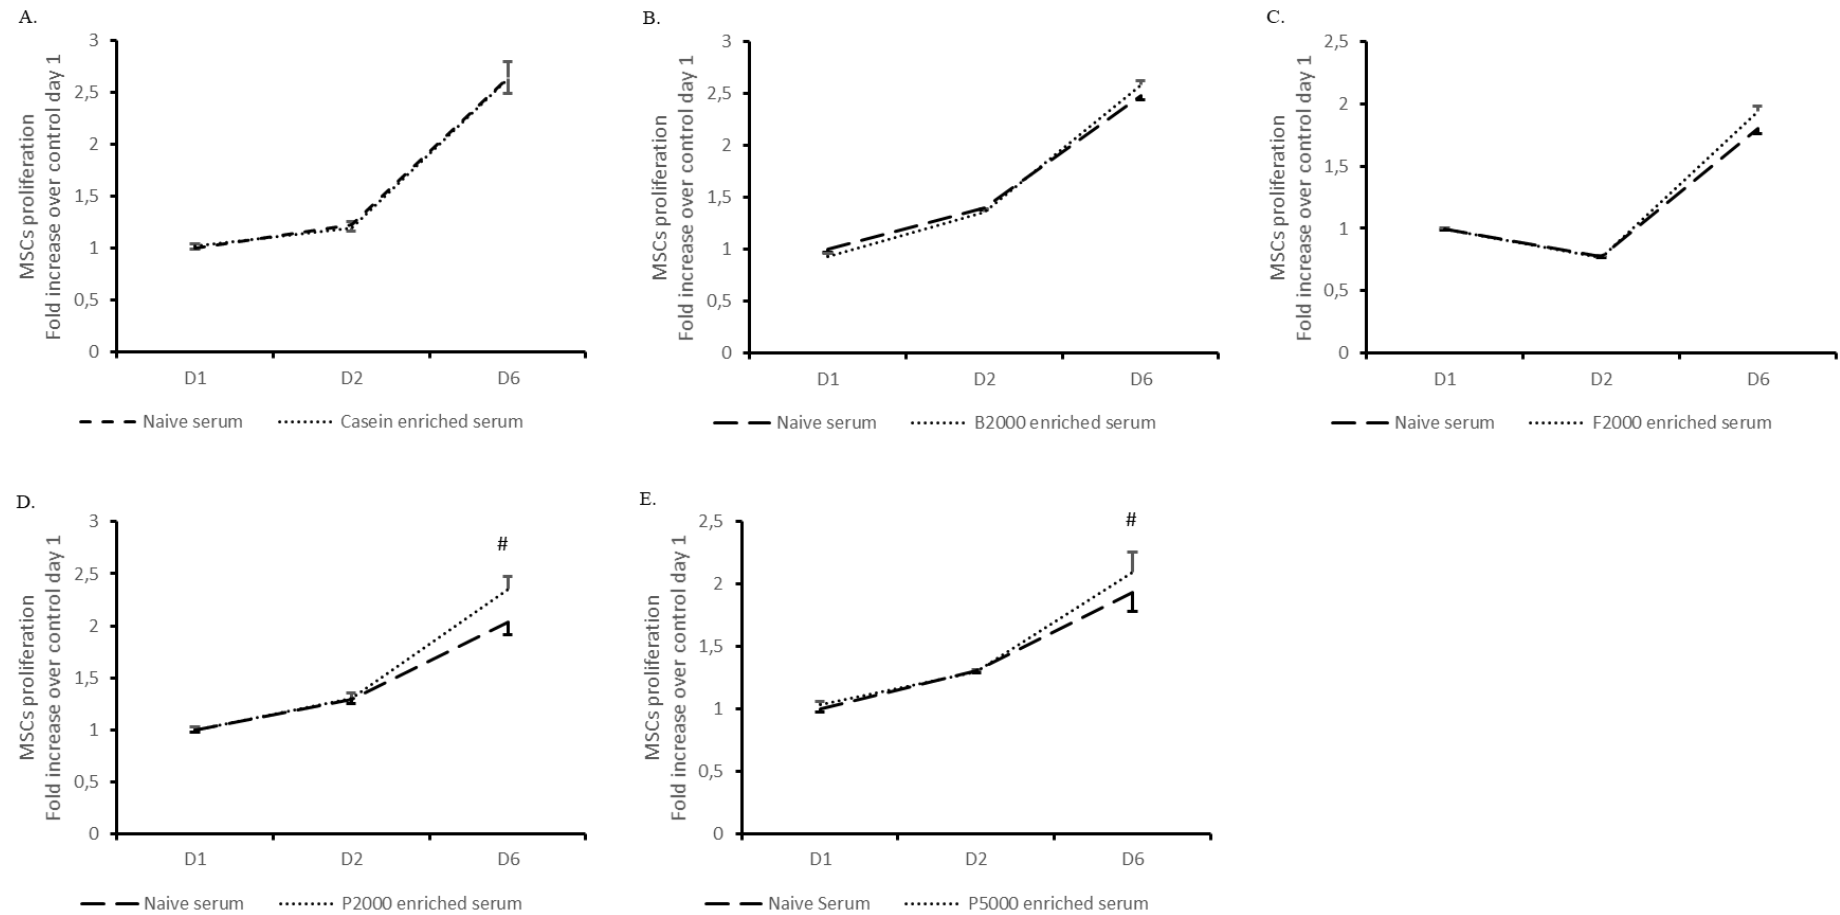

**Figure S4.** Human primary MSC proliferation from day 1 to day 6 following enriched serum incubation. This figure 5S further complements the figure 3B and the proliferation time course depending on protein origin (A) Hydrolysed casein; (B) B2000 (bovine, mean molecular weight 2kDa); (C) F2000 (fish, mean molecular weight 2kDa); (D) P2000 (porcine, mean molecular weight 2kDa) and (E) P5000 (porcine, mean molecular weight 5kDa). #  $p < 0.05$

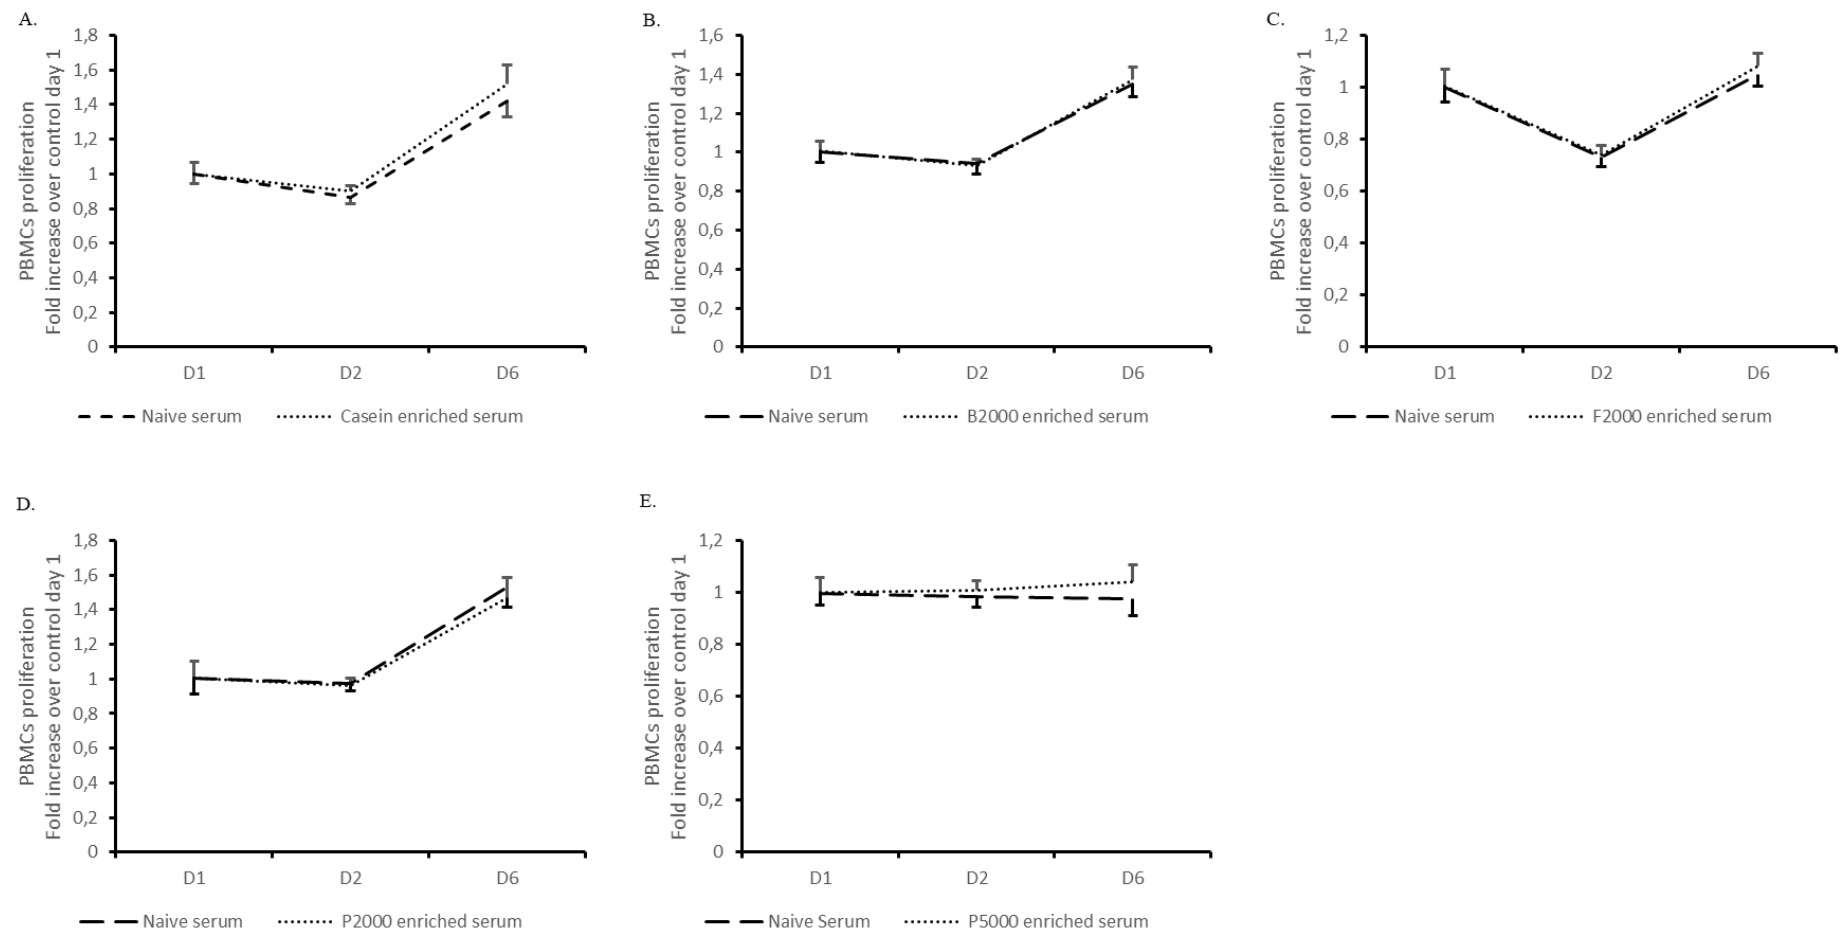

**Figure S5.** Human primary PBMC proliferation from day 1 to day 6 following enriched serum incubation. This figure 6S complements the figure 3C and the proliferation time course depending on protein origin **(A)** Hydrolysed casein; **(B)** B2000 (bovine, mean molecular weight 2kDa); **(C)** F2000 (fish, mean molecular weight 2kDa); **(D)** P2000 (porcine, mean molecular weight 2kDa) and **(E)** P5000 (porcine, mean molecular weight 5kDa).

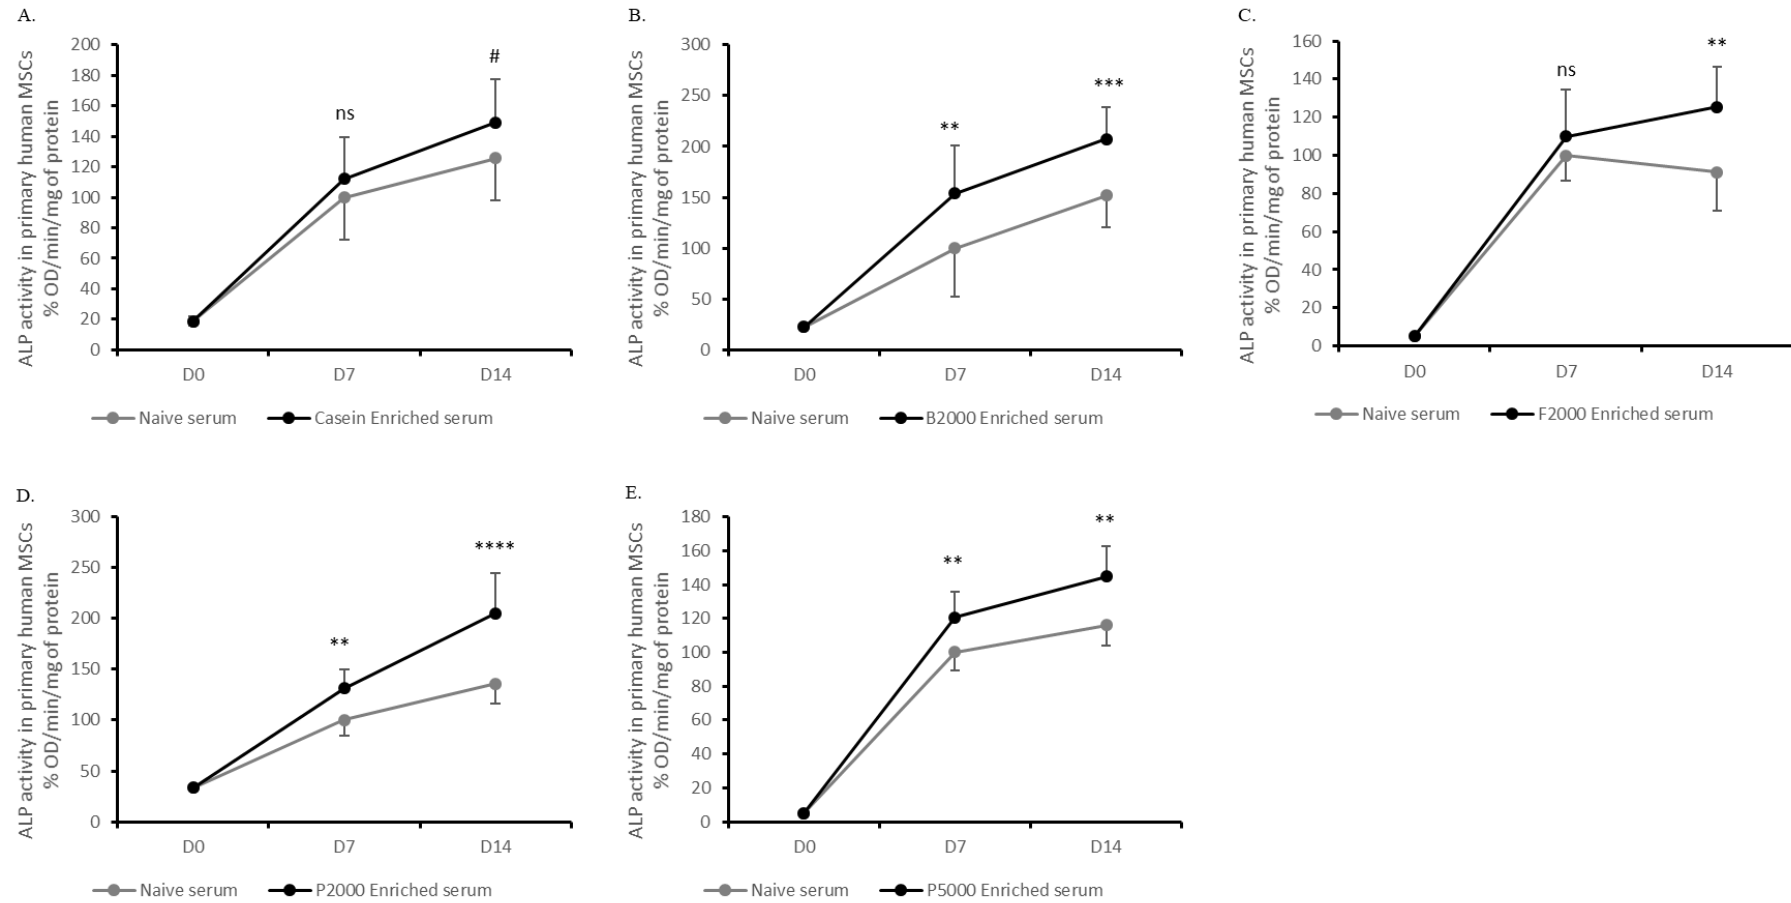

**Figure 6.** ALP activity of human primary MSCs from day 0 to day 14 following enriched serum incubation. This figure S6 complements the figure 4A and the ALP activity depending on incubation time and protein origin (A) Hydrolysed casein; (B) B2000 (bovine, mean molecular weight 2kDa); (C) F2000 (fish, mean molecular weight 2kDa); (D) P2000 (porcine, mean molecular weight 2kDa) and (E) P5000 (porcine, mean molecular weight 5kDa). #  $p < 0.05$ ; \*  $p < 0.01$ ; \*\*  $p < 0.001$ ; \*\*\*  $p < 0.0001$ ; \*\*\*\*  $p < 0.00001$ .

**Table S1.** Composition of the diets: *in vivo* experiment (%).

| <b>Ingredients (%)</b>   | <b>Control 15%</b> | <b>Control 17.5%</b> | <b>B2000</b> |
|--------------------------|--------------------|----------------------|--------------|
| Casein                   | 15                 | 17.5                 | 15           |
| Sucrose                  | 10                 | 10                   | 10           |
| Dextrine                 | 15.5               | 15.5                 | 15.5         |
| Cellulose                | 5                  | 5                    | 5            |
| Saturated fat            | 2                  | 2                    | 2            |
| Sunflower oil            | 2                  | 2                    | 2            |
| Rape seed oil            | 3                  | 3                    | 3            |
| B2000                    |                    |                      | 2.5          |
| L-cystine                | 0.18               | 0.18                 | 0.18         |
| Choline bitartrate       | 0.25               | 0.25                 | 0.25         |
| Mineral mix (AIN-93M-MX) | 3.5                | 3.5                  | 3.5          |
| Vitamin mix (AIN-93-VX)  | 1                  | 1                    | 1            |
| Corn starch              | 42.57              | 40.07                | 40.07        |
| %                        | 100                | 100                  | 100          |
